# Supplementary material
Source: publisher figshare collection journal article supplement (https://gsajournals.figshare.com/articles/dataset/_/14535636)
Supplement: Supplementary file 2 [file 1]

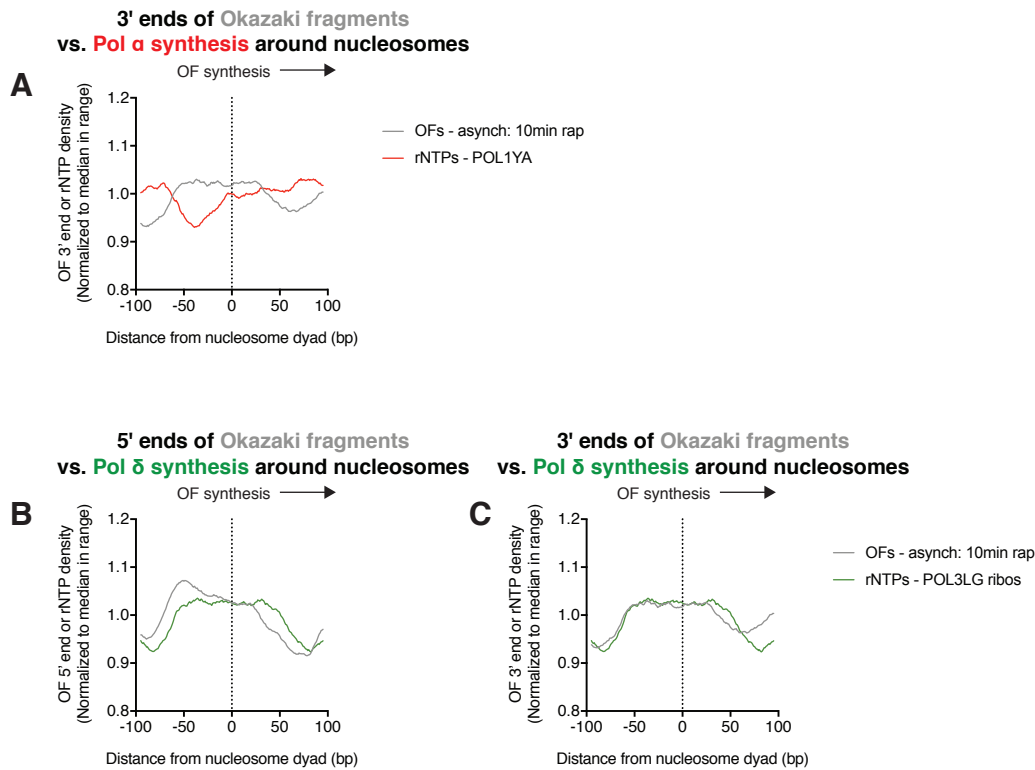

A. Distribution of Okazaki fragment 3' ends around the midpoints of high-confidence nucleosomes (Jiang and Pugh 2009) in asynchronous cultures with ten minutes of rapamycin (gray). Ribonucleotides from asynchronous cultures of POL1-Y869A *rh201Δ* strain (red) are from (Zhou et al. 2019). Data are smoothed to 5 bp and normalized to the median value in the range  $\pm 100$  bp from the nucleosome midpoint.

B-C. Distribution of Okazaki fragment 5' (B) and 3' (C) ends around the midpoints of high-confidence nucleosomes (Jiang and Pugh 2009) in asynchronous cultures with ten minutes of rapamycin (gray). Ribonucleotides from asynchronous cultures of POL3-L612G *rh201Δ* strain (green) are from (Zhou et al. 2019). Data are smoothed to 5 bp and normalized to the median value in the range  $\pm 100$  bp from the nucleosome midpoint.
