# Supplementary material
Source: publisher figshare collection journal article supplement (https://gsajournals.figshare.com/articles/dataset/_/14535636)
Supplement: Supplementary file 3 [file 1]

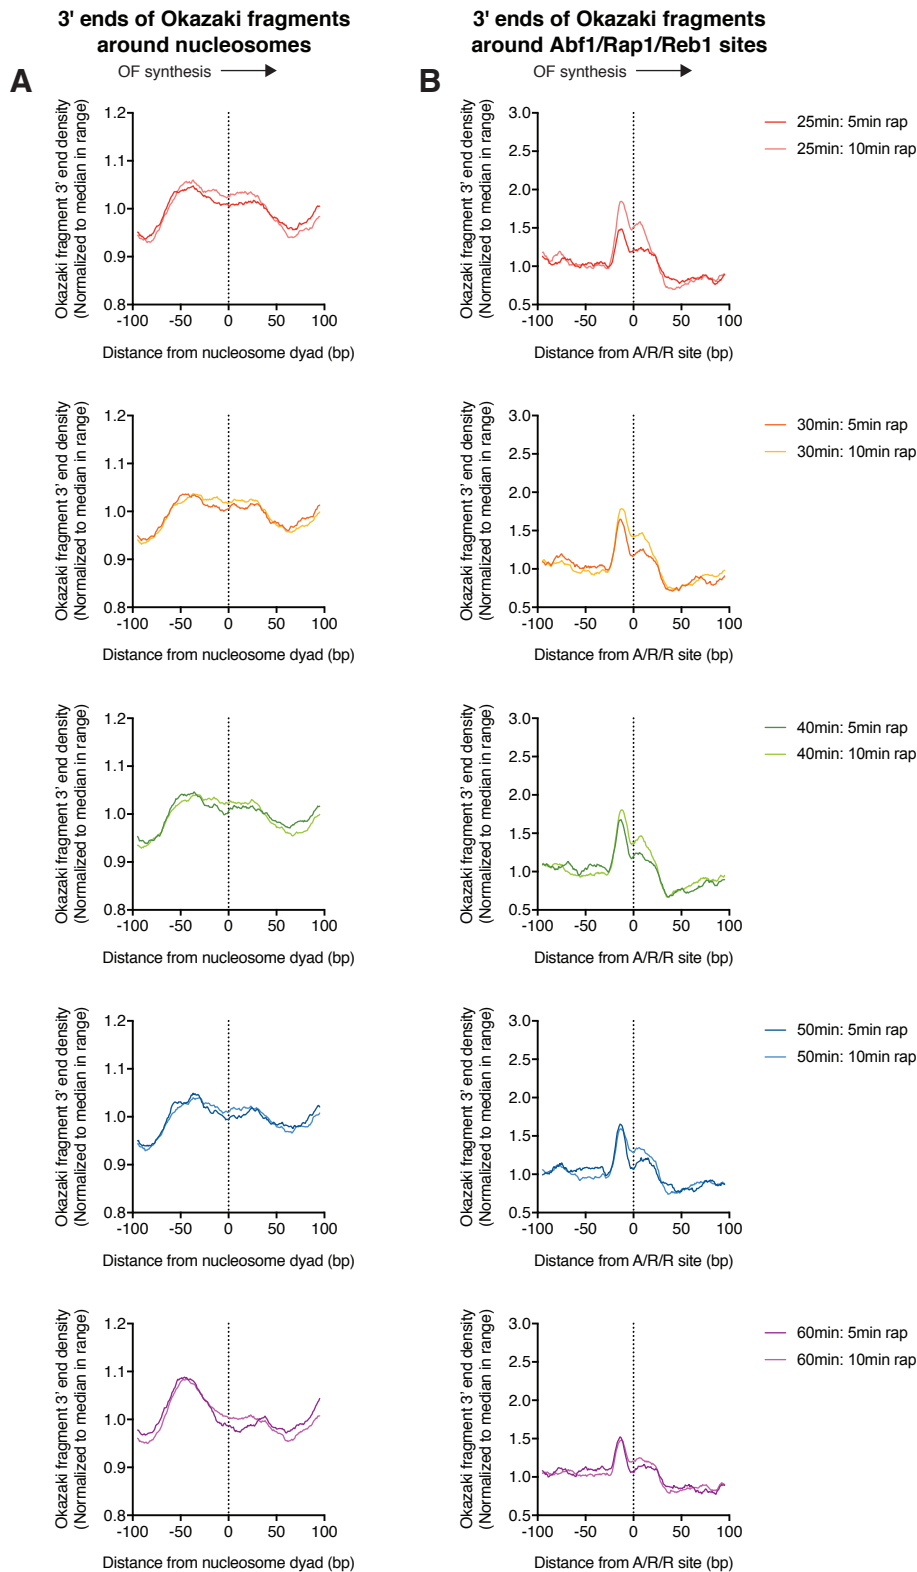

A. Distribution of Okazaki fragment 3' ends around the midpoints of high-confidence nucleosomes (Jiang and Pugh 2009) treated with rapamycin for five or ten minutes at the indicated time after alpha-factor release. Data are smoothed to 5 bp and normalized to the median value in the range  $\pm 100$  bp from the nucleosome midpoint.

B. Distribution of Okazaki fragment 3' ends around Abf1/Reb1/Rap1 sites (Maclsaac et al. 2006) treated with rapamycin for five or ten minutes at the indicated time after alpha-factor release. Data are smoothed to 5 bp and normalized to the median value in the range  $\pm 100$  bp from the transcription-factor binding site midpoint.
